# Supplementary material for: Betulin, a Newly Characterized Compound in Acacia Auriculiformis Bark, is a Multi-target Protein Kinase Inhibitor
Source: Preprints.org preprint supplement (doi:10.20944/preprints202106.0115.v1), 2021-06-03
Supplement: Supplementary file 3 [file supplementary]

# Betulin, a newly characterized compound in *Acacia auriculiformis* bark, is a multi-target protein kinase inhibitor

Augustine A. Ahmadu<sup>\*,\*\*,\*\*\*,1</sup>, Claire Delehouzé<sup>2,3</sup>, Anas Haruna<sup>1</sup>, Lukman Mustapha<sup>1</sup>, Bilqis A. Lawal<sup>4</sup>, Aniefiok Udobre<sup>5</sup>, Blandine Baratte<sup>2,6</sup>, Camilla Triscornia<sup>2</sup>, Axelle Autret<sup>3</sup>, Thomas Robert<sup>2,6</sup>, Jeannette Chloë Bulinski<sup>2,7</sup>, Morgane Rousselot<sup>3</sup>, Mélanie Simoes Eugénio<sup>3,8</sup>, Marie-Thérèse Dimanche-Boitrel<sup>8,9</sup>, Jacobus P. Petzer<sup>10,11</sup>, Lesetja J. Legoabe<sup>10</sup> and Stéphane Bach<sup>\*\*,\*\*\*,2,6,10</sup>

<sup>1</sup> Department of Pharmaceutical and Medicinal Chemistry, Faculty of Pharmaceutical Sciences, Kaduna State University, Nigeria; ahmadu2001@yahoo.com; anas.haruna@kasu.edu.ng; lukman.mustapha@kasu.edu.ng

<sup>2</sup> Sorbonne Université, CNRS, UMR8227, Integrative Biology of Marine Models Laboratory (LBI2M), Station Biologique de Roscoff, 29680 Roscoff, France; blandine.baratte@sb-roscoff.fr; camilla.triscornia@gmail.com; trobert@sb-roscoff.fr; bach@sb-roscoff.fr

<sup>3</sup> SeaBeLife Biotech, Place Georges Teissier, 29680, Roscoff, France; claire.delehouze@seabelife.com; axelle.autret@lekreisker.fr; morgane.rousselot@seabelife.com; melanie.simoeseugenio@univ-rennes1.fr

<sup>4</sup> Department of Pharmacognosy and Drug Development, Faculty of Pharmaceutical Sciences, University of Ilorin, Ilorin, Nigeria; lawal.ba@unilorin.edu.ng

<sup>5</sup> Department of Pharmaceutical and Medicinal Chemistry, Faculty of Pharmacy, University of Uyo, Nigeria; aniefiokudobre@uniuyo.edu.ng

<sup>6</sup> Sorbonne Université, CNRS, FR2424, Plateforme de criblage KISSf (*Kinase Inhibitor Specialized Screening facility*), Station Biologique de Roscoff, 29680 Roscoff, France

<sup>7</sup> Department of Biological Sciences, Columbia University, New York, NY 10027, USA; jcb4@cumc.columbia.edu

<sup>8</sup> INSERM UMR 1085, Institut de Recherche sur la Santé, l'Environnement et le Travail (IRSET), F-35043 Rennes, France; marie-therese.boitrel@univ-rennes1.fr

<sup>9</sup> Biosit UMS 3080, Université de Rennes 1, F-35043 Rennes, France

<sup>10</sup> Centre of Excellence for Pharmaceutical Sciences, North-West University, Private Bag X6001, Potchefstroom 2520, South Africa; Jacques.Petzer@nwu.ac.za; Lesetja.Legoabe@nwu.ac.za

<sup>11</sup> Pharmaceutical Chemistry, School of Pharmacy, North-West University, Private Bag X6001, Potchefstroom 2520, South Africa

\* Current address: Department of Pharmaceutical and Medicinal Chemistry, Faculty of Pharmacy, University of Calabar, Nigeria.

\*\* Correspondence: ahmadu2001@yahoo.com; Tel.: +234-80-37-03-35-05 (AA); bach@sb-roscoff.fr; Tel.: +33 2 98 29 23 91 (S.B.).

\*\*\* These authors share senior authorship.

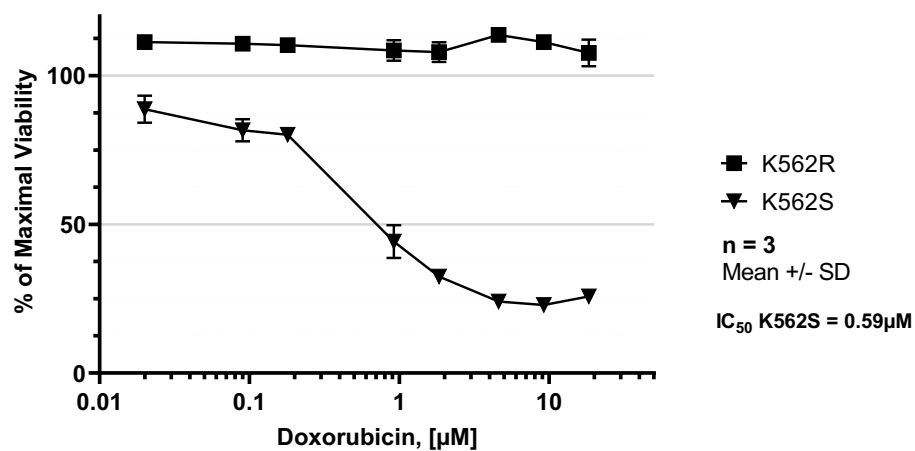

**Figure S1.** *In vitro* effect of doxorubicin on the cell viability of K562 chronic myelogenous leukemia (CML) cells. The viability of K562S and K562R CML cell lines, that are respectively sensitive (S) and resistant (R) to treatment with doxorubicin, was studied by using the MTS assay. Cell viability was measured after 48-hours exposure to increasing doses of doxorubicin. The IC<sub>50</sub> value was determined from the dose-response curve using GraphPad PRISM Software. Data are mean (n=3) ± SD expressed in % of maximal viability (cells treated with a similar dose of DMSO).

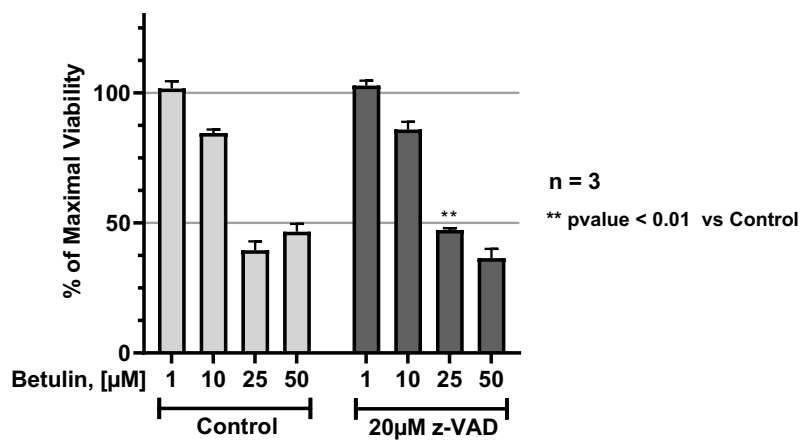

**Figure S2.** The effect of treatment with pan caspase inhibitor z-VAD-fmk on the phenotype induced by betulin. The viability of K562S CML cell line was studied by using the MTS assay. Cell viability was studied after 48-hours exposure of increasing doses of betulin (from 1 to 50μM) alone or co-treated with 20μM of z-VAD-fmk. Data are mean (n=3) ± SD expressed in % of maximal viability (cells treated with a similar dose of DMSO). \*\* p<0.01 vs control.

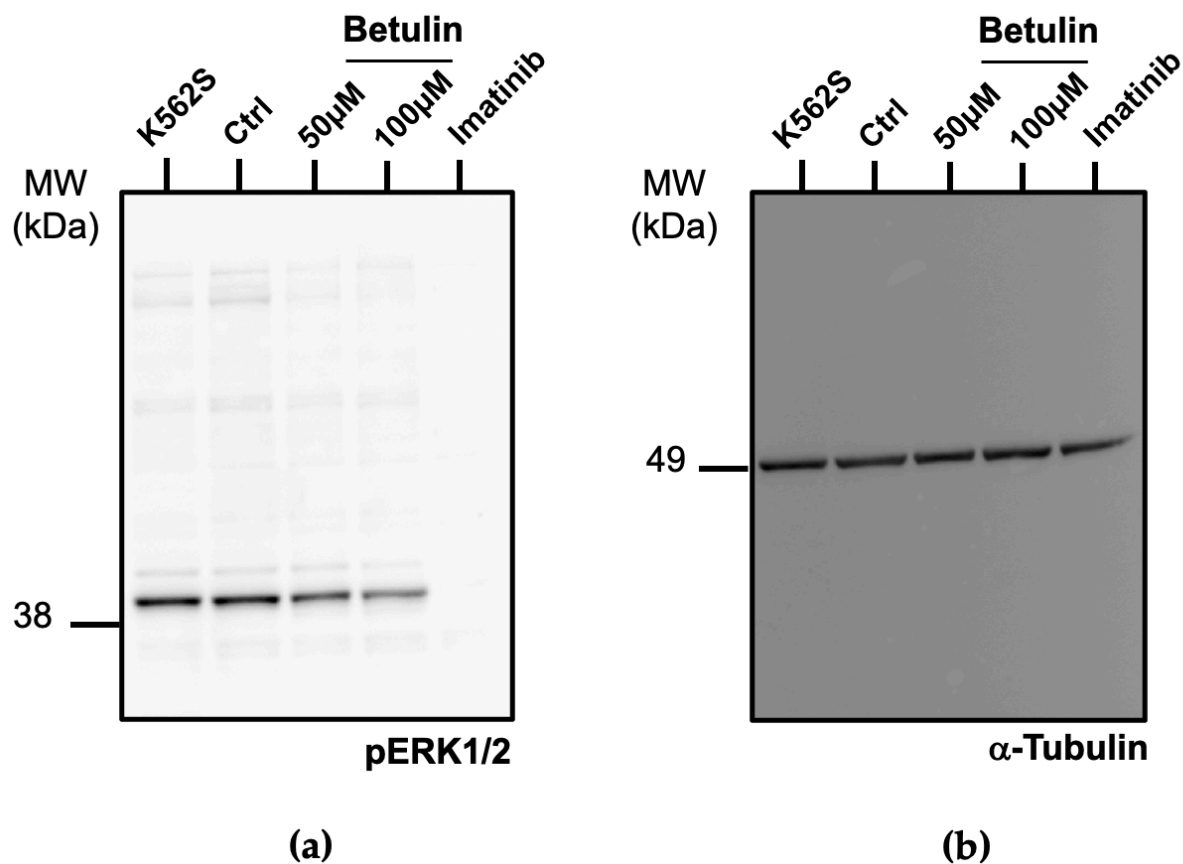

**Figure S3.** Effects of betulin on extracellular signal-regulated kinases (ERK) signaling. K562S CML cells were untreated (K562S) or treated with 1% DMSO, 50 or 100µM of betulin or 20µM of imatinib mesylate for 6 hours and immunoblot analysis was conducted as described in the Methods section. Extracts of K562S cells were analyzed by SDS-PAGE followed by Western blotting with antibodies directed against phospho-ERK1/2 (Thr202/Tyr204) (a) and  $\alpha$ -Tubulin (b).
