# Supplementary material for: Betulin, a Newly Characterized Compound in Acacia Auriculiformis Bark, is a Multi-target Protein Kinase Inhibitor
Source: Preprints.org preprint supplement (doi:10.20944/preprints202106.0115.v1), 2021-06-03
Supplement: Supplementary file 9 [file supplementary]

Archive with 9 entries (8 files):
- Ahmadu_et_al_FigS1_Molecules_Submitted.pdf
- __MACOSX/
- __MACOSX/._Ahmadu_et_al_FigS1_Molecules_Submitted.pdf
- Ahmadu_et_al_FigS2_Molecules_Submitted.pdf
- __MACOSX/._Ahmadu_et_al_FigS2_Molecules_Submitted.pdf
- Ahmadu_et_al_SupplementaryMaterials_Submitted.pdf
- __MACOSX/._Ahmadu_et_al_SupplementaryMaterials_Submitted.pdf
- Ahmadu_et_al_FigS3_Molecules_Submitted.pdf
- __MACOSX/._Ahmadu_et_al_FigS3_Molecules_Submitted.pdf
