# Supplementary figures and images for: Betulin, a Newly Characterized Compound in Acacia Auriculiformis Bark, is a Multi-target Protein Kinase Inhibitor
Source: Preprints.org preprint supplement (doi:10.20944/preprints202106.0115.v1), 2021-06-03

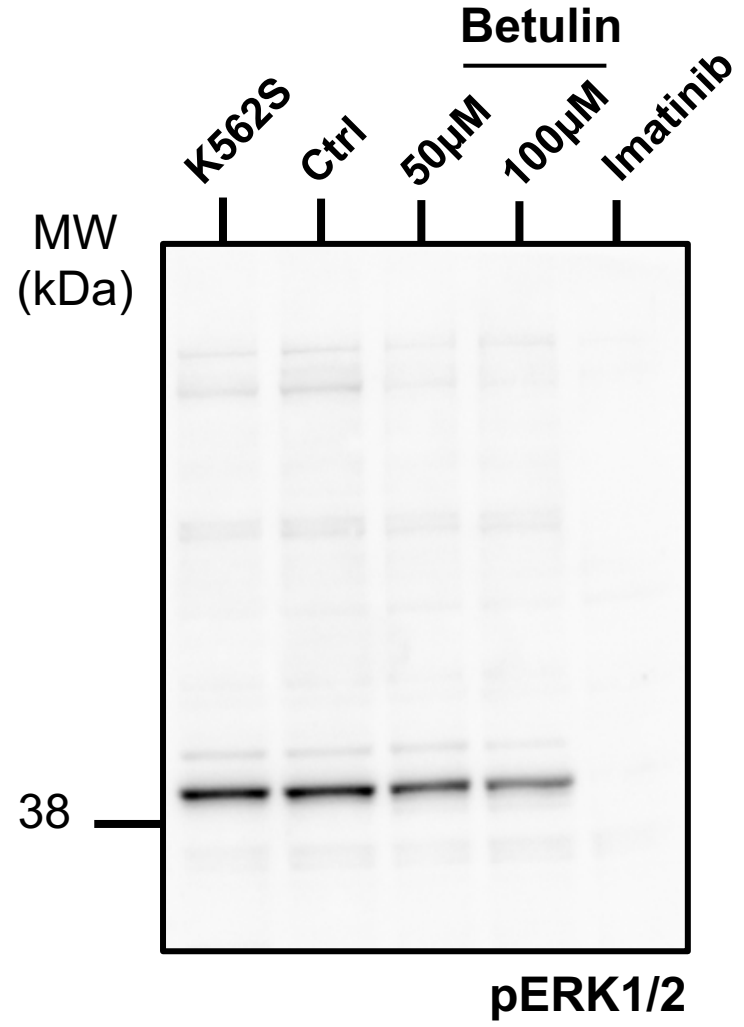

(a)

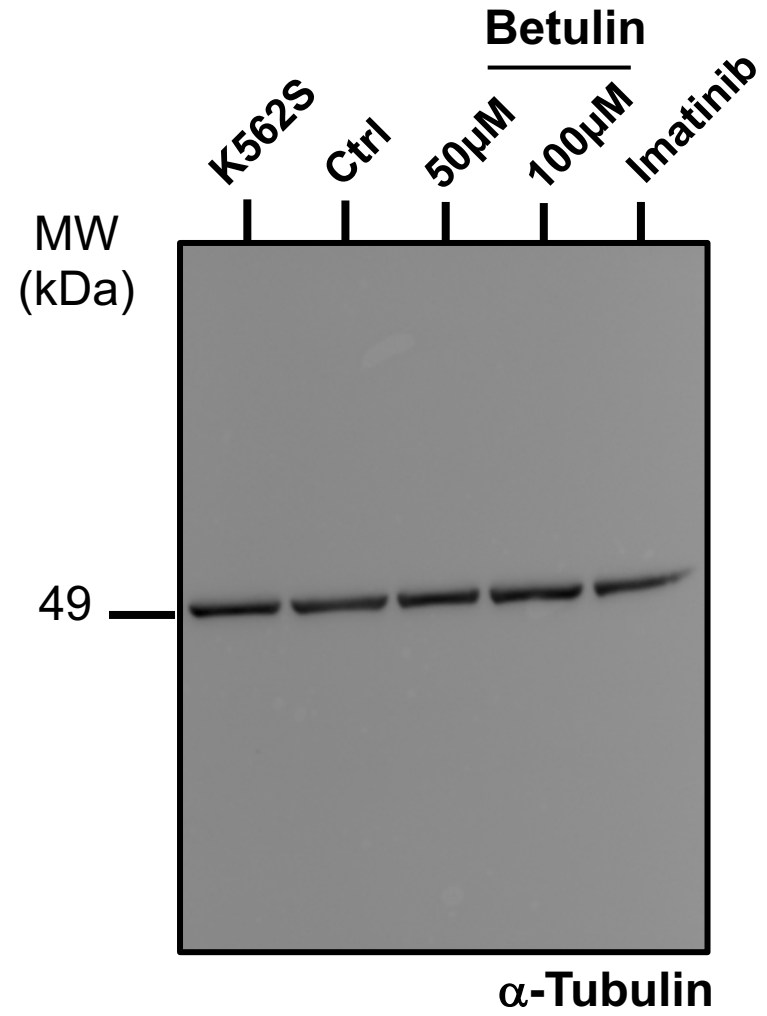

(b)

Supplement: Supplementary file 1 [file supplementary]

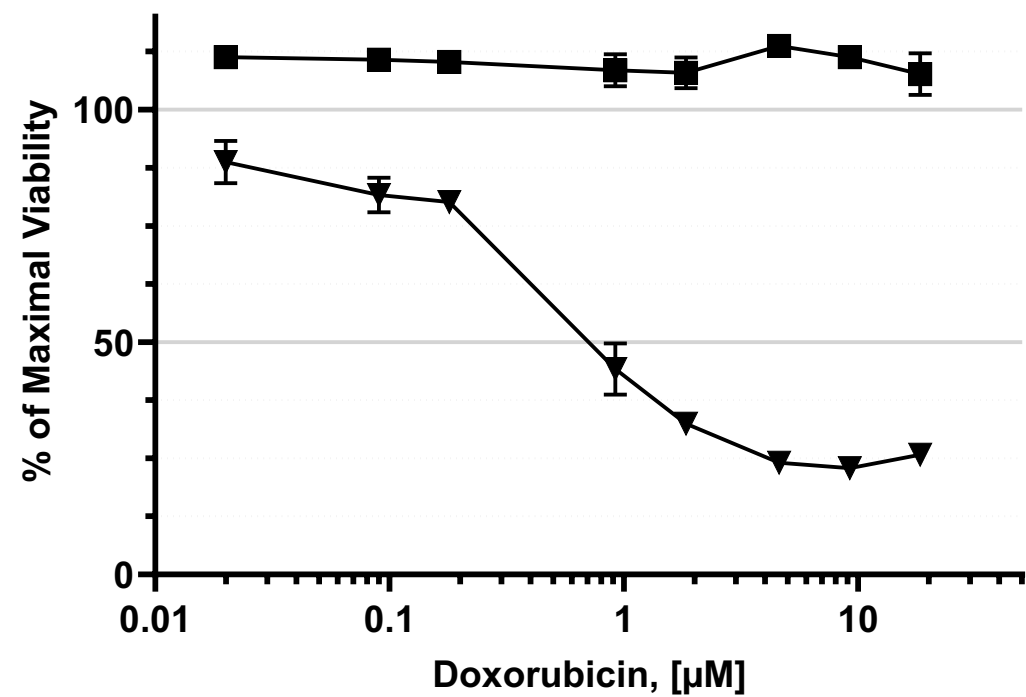

■ K562R

▼ K562S

n = 3

Mean +/- SD

$\text{IC}_{50}$  K562S = 0.59  $\mu\text{M}$

Supplement: Supplementary file 4 [file supplementary]

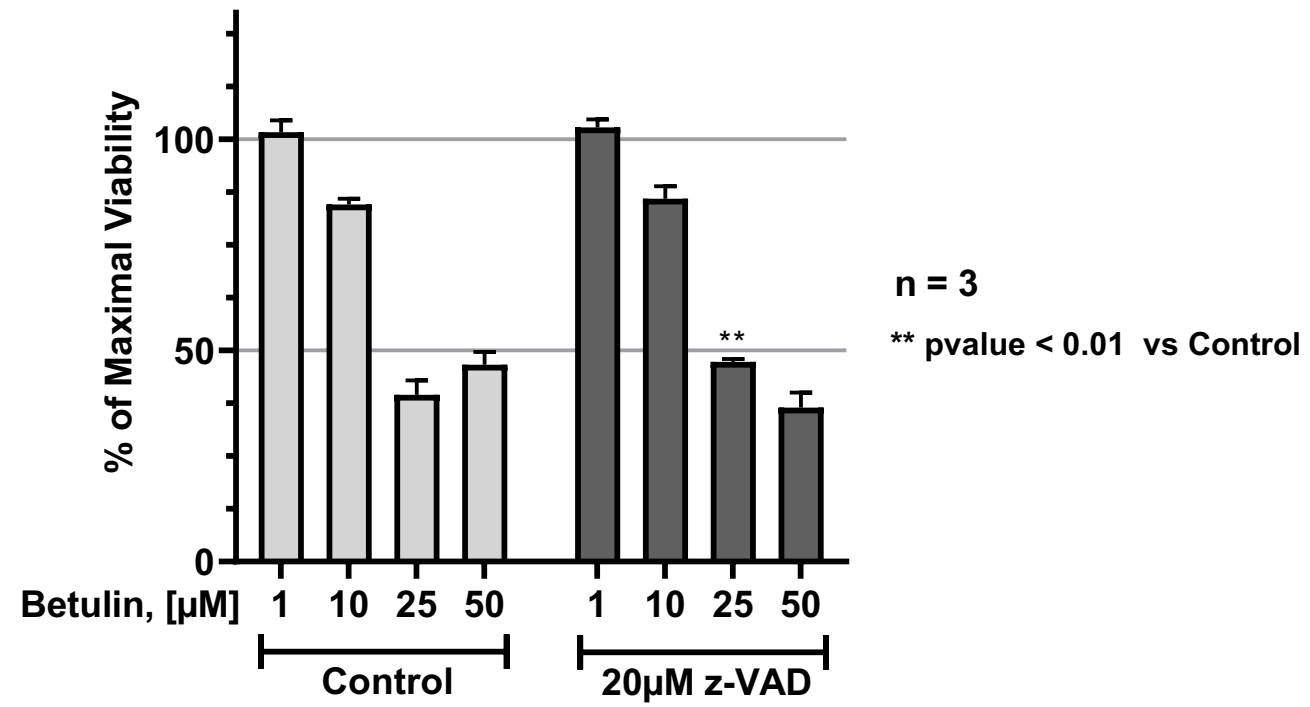

Supplement: Supplementary file 7 [file supplementary]
